# Supplementary material for: An Exhaustive Epistatic SNP Association Analysis on Expanded Wellcome Trust Data
Source: PubMed Central journal article supplement — Sci Rep. 2013 Jan 22;3:1099. doi: 10.1038/srep01099 (PMC3551227; doi:10.1038/srep01099), 2013-01-22
Supplement: srep01099-s1.pdf [file srep01099-s1.pdf]

# **An Exhaustive Epistatic SNP Association Analysis on Expanded Wellcome Trust Data**

Christoph Lippert<sup>1,3,\*</sup>, Jennifer Listgarten<sup>1,3,\*</sup>, Robert I. Davidson<sup>2,3</sup>, Scott Baxter<sup>2</sup>, Hoifung Poong<sup>2</sup>, Carl M. Kadie<sup>2</sup>, and David Heckerman<sup>1,3,\*</sup>

<sup>1</sup>Microsoft Research  
Los Angeles, CA, USA

<sup>2</sup>Microsoft Research  
Redmond, WA, USA

<sup>3</sup>These authors contributed equally to this work.

\*Corresponding author emails: {lippert,jennl,[heckerma](mailto:heckerma@microsoft.com)}@microsoft.com

## **Supplementary Information**

**Supplementary Figure 1:** Quantile-quantile plots for epistatic interactions

Supplementary Figure 1

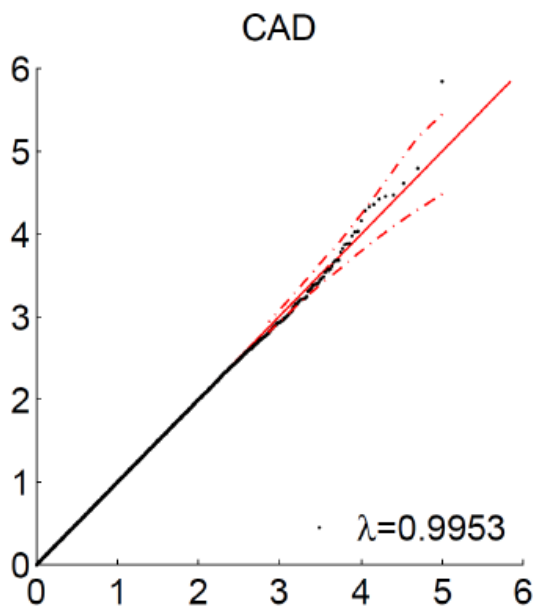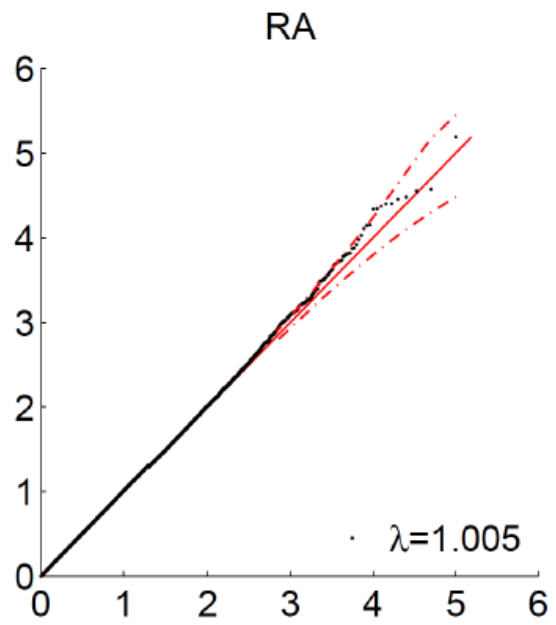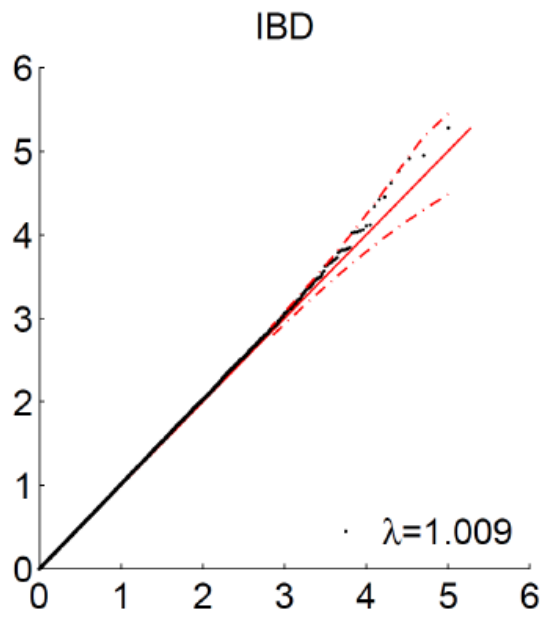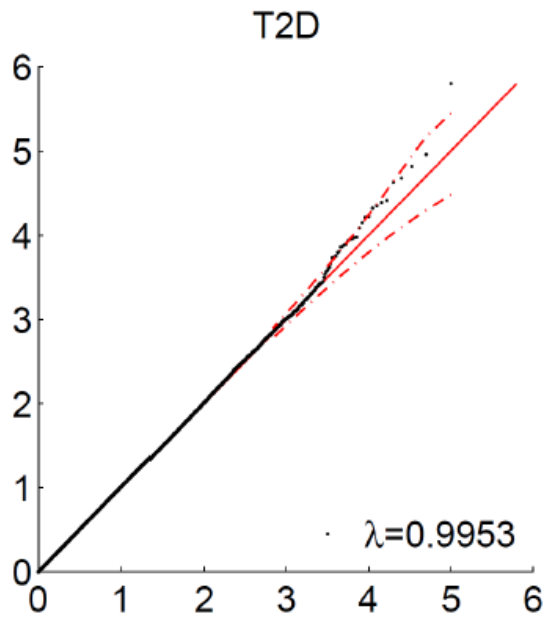

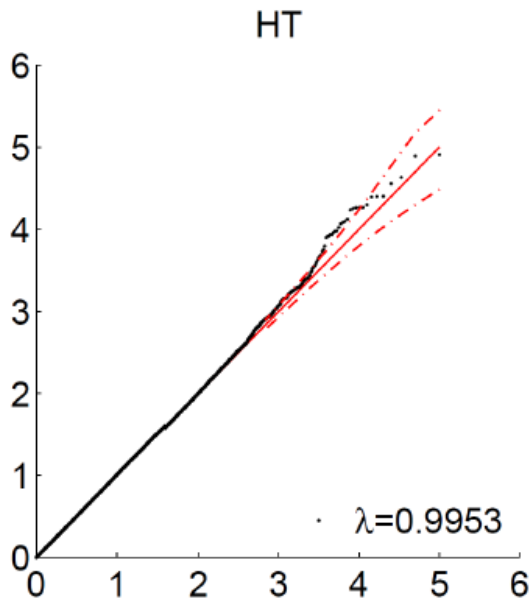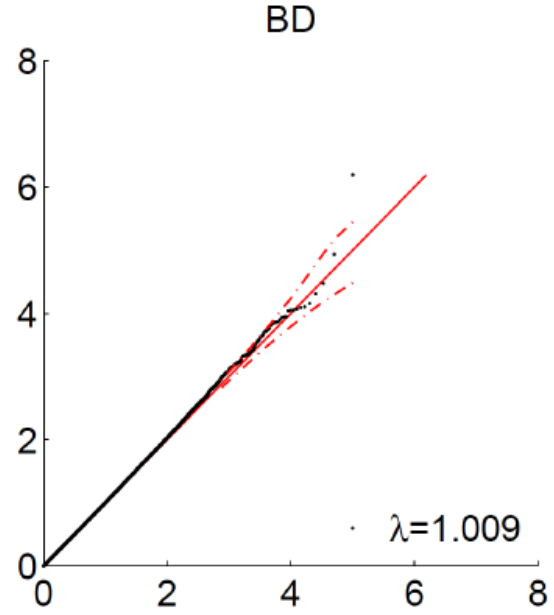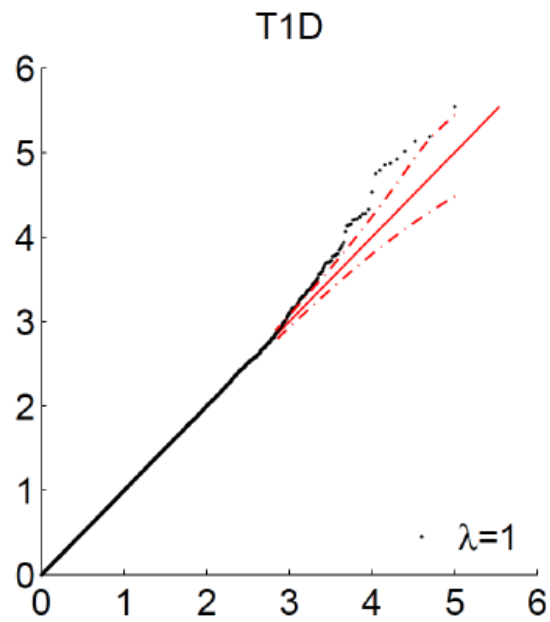

**Quantile-quantile plots for epistatic interactions.** Dashed lines show 0.05 confidence intervals. The dot adjacent to each  $\lambda$  is not an outlier.
